# Supplementary material for: AR-v7 protein expression is regulated by protein kinase and phosphatase
Source: PubMed Central journal article supplement (PMC4741799; doi:10.18632/oncotarget.5608), 2015-09-10
Supplement: oncotarget-06-33743-s001.pdf [file oncotarget-06-33743-s001.pdf]

## AR-v7 protein expression is regulated by protein kinase and phosphatase

### Supplementary Material

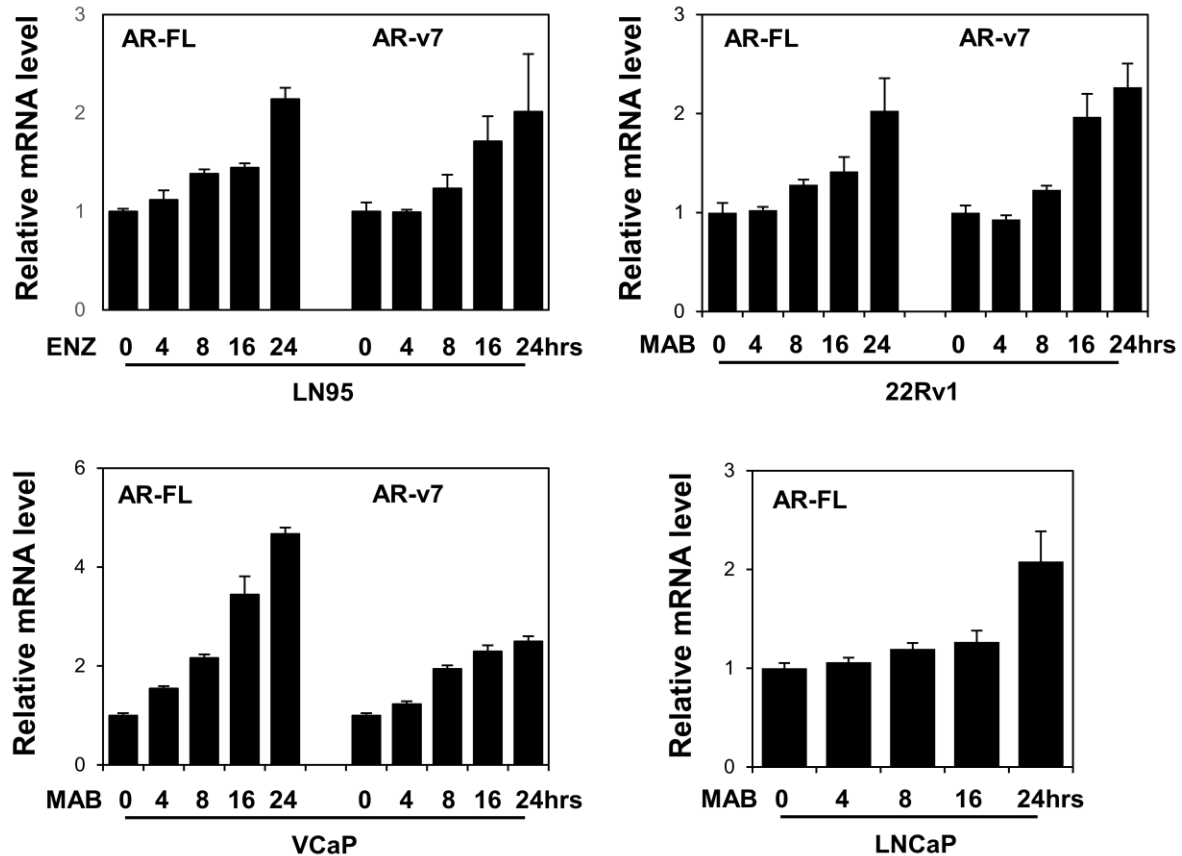

**Figure S1**

LN95, 22Rv1 and VCaP cells were cultured in medium containing 5% FBS and LNCaP95 cells in medium containing 5% charcoal stripped serum (CSS) for 24 hours before replaced with medium containing 5% CSS and 5 $\mu$ M of enzalutamide (ENZ) for 0-24 hours. Total mRNA was extracted. AR-FL and AR-v7 mRNA levels relative to 18S rRNA were determined by real-time qPCR.

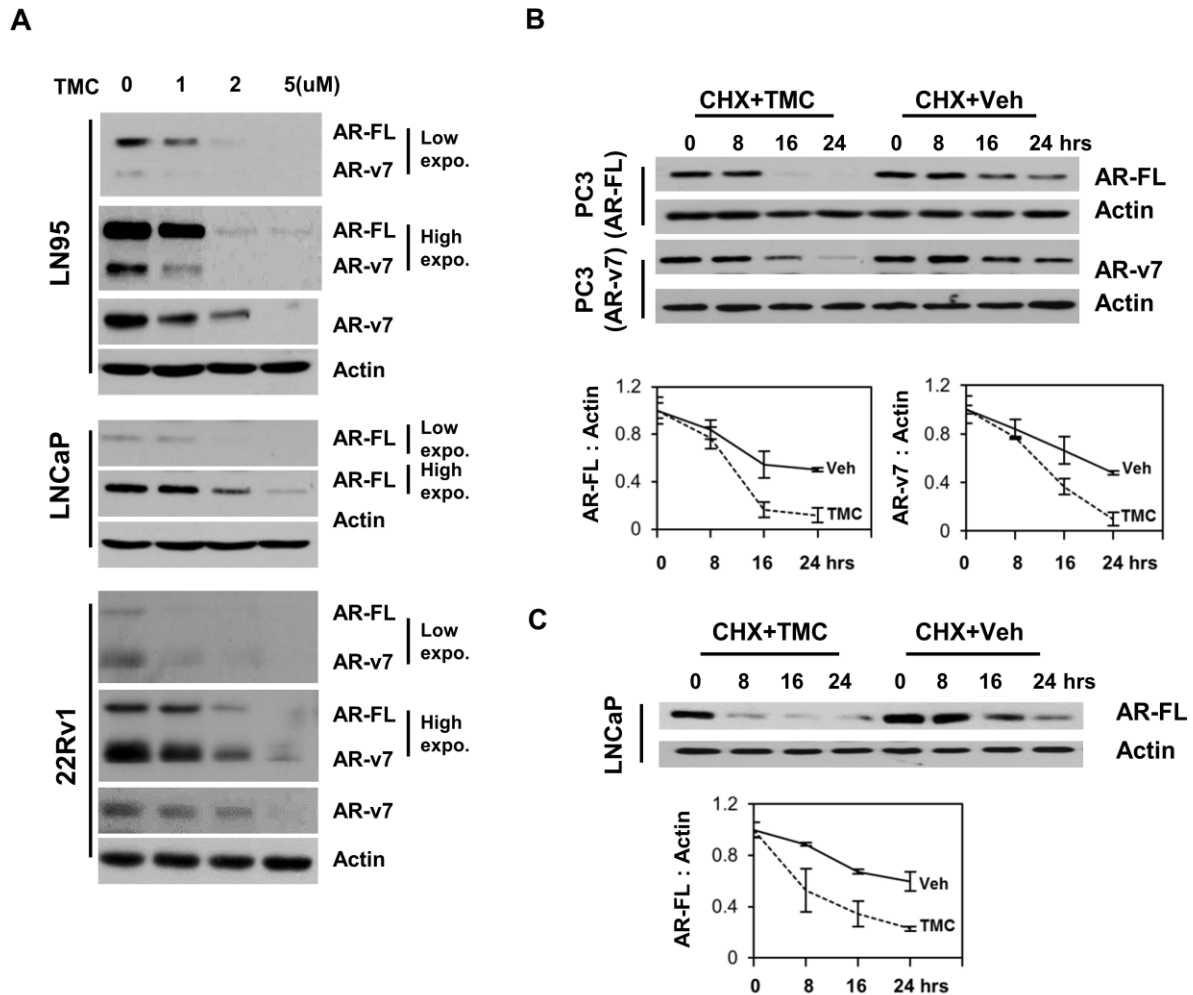

**Figure S2**

LNCaP, PC-3 and 22Rv1 cells were cultured in medium containing 5% FBS. LNCaP95 cells were in medium containing 5% charcoal stripped serum (CSS). (A) LNCaP95, LNCaP and 22Rv1 cells were treated with 0, 1, 2, and 5  $\mu$ M of tautomycetin (TMC) for 0-24 hours. AR-FL, AR-v7 and  $\beta$ -actin protein levels were measured by Western blotting. (B) PC3(AR-FL) and PC3(AR-v7) cells and (C) LNCaP cells were treated with 50  $\mu$ g/ml cycloheximide (CHX) plus either vehicle or 5  $\mu$ M of TMC for 0-24 hours. AR-FL and AR-v7 protein levels were measured by Western blotting. Densitometry analyses of AR-FL and AR-v7 levels were normalized to  $\beta$ -actin. Results were from triplicate experiments. Data in line graphs represent means  $\pm$  SD.

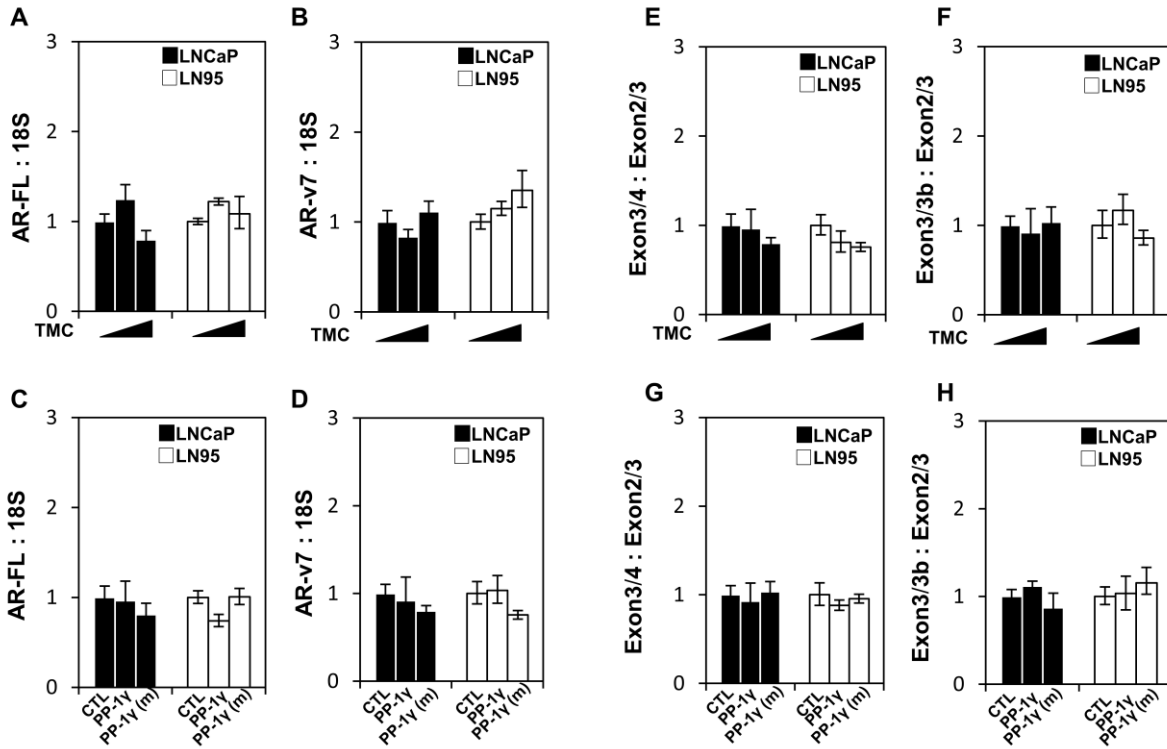

**Figure S3**

LNCaP cells were cultured in medium containing 5% FBS, while LNCaP95 cells were in medium containing 5% charcoal stripped serum (CSS). LNCaP and LNCaP95 cells were treated with 0, 2, 5 μM of TMC (**A, B, E and F**) or transfected with expression vector of control, PP-1γ or PP-1γ(H125A) (**C, D, G and H**) for 24 hours. Real-time PCR measured AR-FL and AR-v7 mRNA levels relative to 18S (**A-D**). Real-time PCR measured AR-FL splicing (**E and G**) and AR-v7 splicing (**F and H**) rates relative to all AR transcripts. Primers were designed to cover the junctions of exons 3 and 4 for AR-FL, exons 3 and 3b for AR-v7 and exons 2 and 3 for total AR transcripts. Results were from three independent experiments. Data in line graphs represent means ± SD.

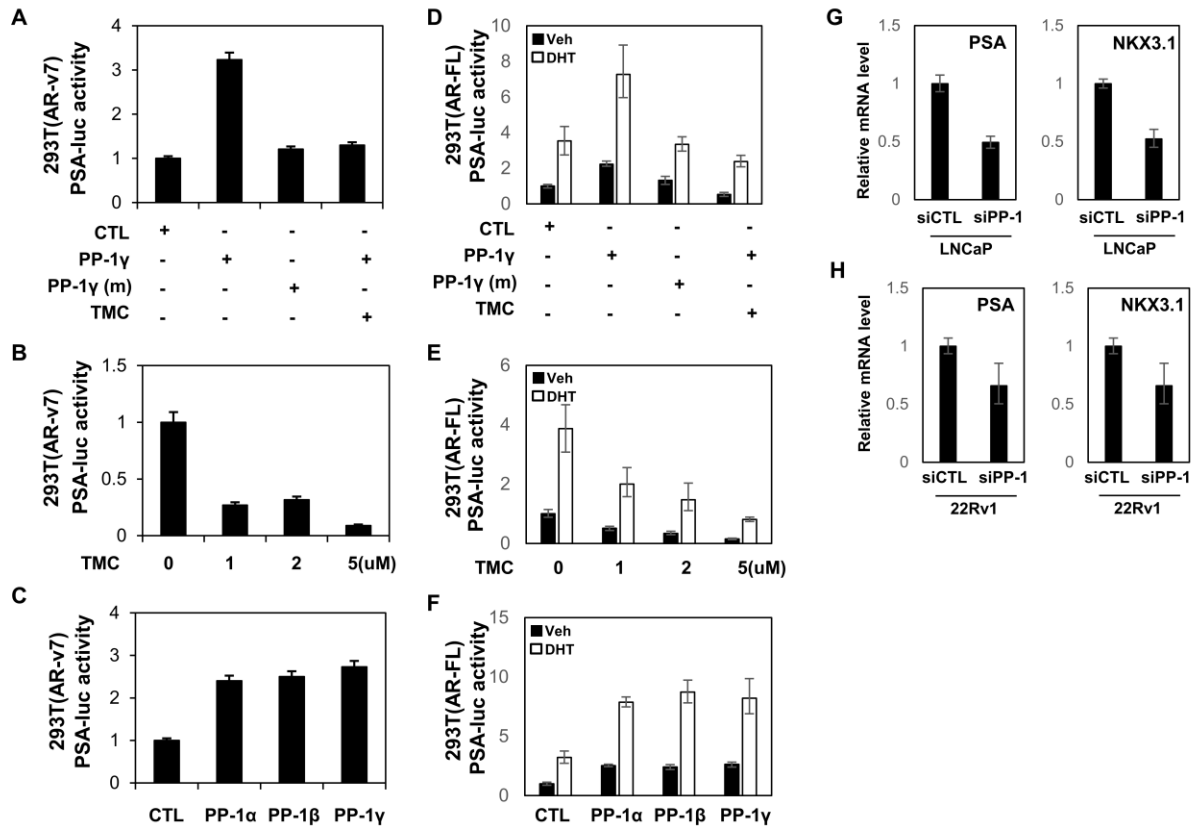

**Figure S4**

293T cells were transfected with AR-v7 (**A, B and C**) or AR-FL (**D, E and F**) expression vector, PSA-luciferase reporter and a renilla reporter. (**A and D**) Cells were also transfected with control, PP-1 $\gamma$  or PP-1 $\gamma$ (m) plasmid and treated with either vehicle or 5 $\mu$ M of TMC for 24h. (**B and E**) Cells were treated with 0, 1, 2, 5 $\mu$ M of TMC for 24 hours. (**C and F**) Cells were co-transfected with control, PP-1 $\alpha$ , PP-1 $\beta$  or PP-1 $\gamma$  for 24 hours. Luciferase assays were performed as described in *Material and Method* section. Data in line graphs represent means  $\pm$  SD. (**G and H**) (G) LNCaP and (H) 22Rv1 cells were transfected with control siRNA or pooled siRNA against PP-1 $\alpha$ , PP-1 $\beta$  or PP-1 $\gamma$ . Total mRNA was collected after 48 hours post transfection. Real-time PCR measured PSA and NKX3.1 mRNA levels relative to 18S.

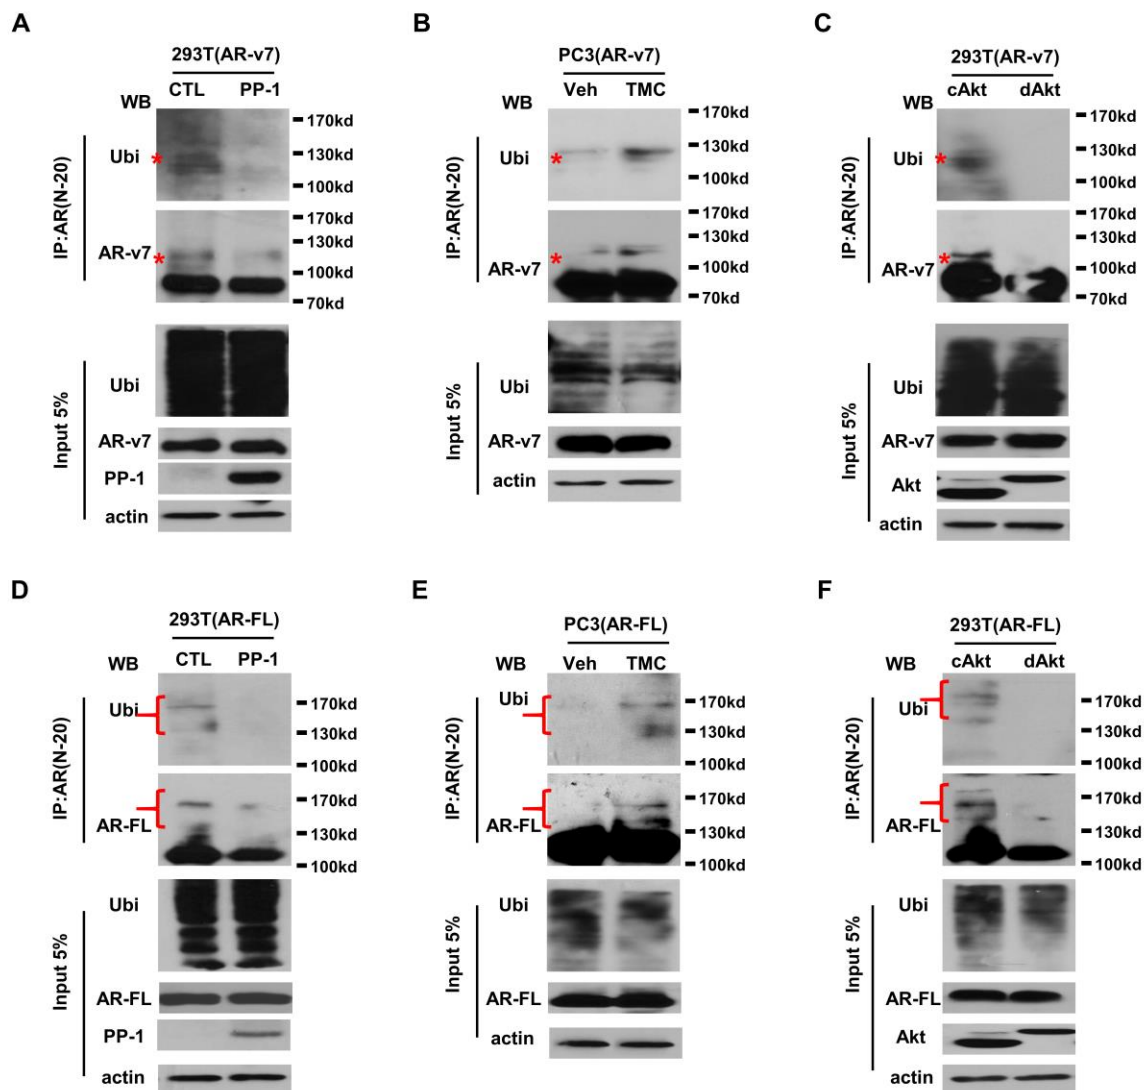

**Figure S5.**

(**A and C**) 293T cells were transfected with AR-v7 plasmid. (**B**) PC3(AR-v7) cells were stably expressing AR-v7. (**D and F**) 293T cell was transfected with AR-FL plasmid. (**E**) PC3(AR-FL) cells were stably expressing AR-FL. (**A and D**) Cells were also transfected with either control or PP-1 $\alpha$  expression vector. (**B and E**) Cells were also treated with vehicle or 5 $\mu$ M of TMC. (**C and F**) Cells were also transfected with cAkt or dAkt expression vector. Cells were also treated with 2 $\mu$ g/ml of MG132 for another 16 hours. *In vivo* ubiquitination assays were performed as described in *Material and Method* section. All experiments were repeated at least three times with one set of results shown in the figure.

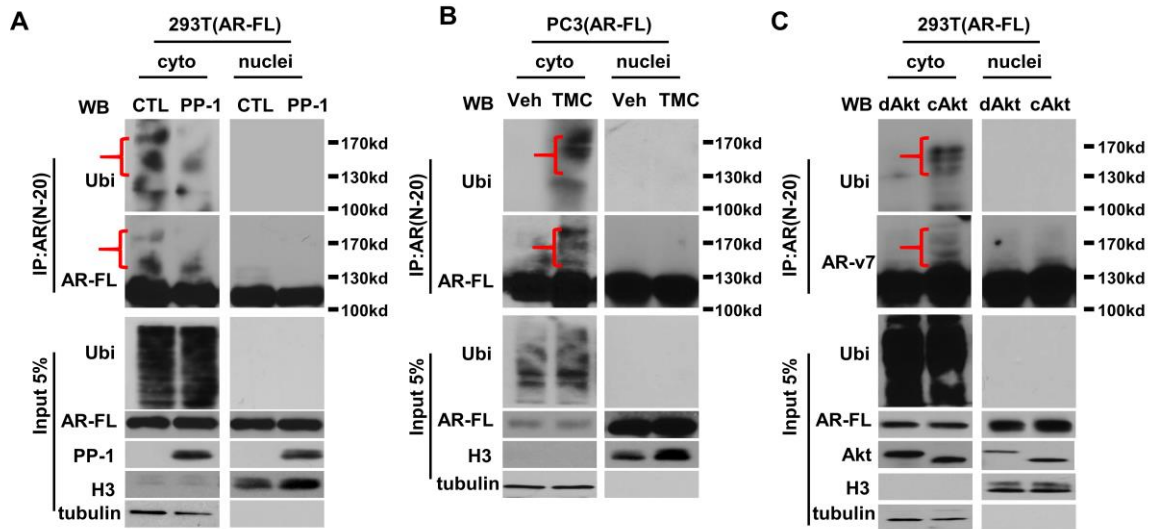

**Figure S6.**

293T and PC-3 cells were cultured in medium containing 5% FBS. 293T cells were transfected with AR-FL (**A and C**) plasmid. PC3 cells were stably introduced AR-FL (**B**). Both cell lines were culture in medium containing 5% FBS. Cells were co-transfected with either control or PP-1 $\alpha$  plasmid (**A**), or treated with vehicle or 5 $\mu$ M of TMC (**B**) or transfected with dAkt or cAkt expression vector for 24 hours (**C**). Cells were also treated with 2 $\mu$ g/ml of MG132 for another 16 hours. Cytoplasmic and nuclear fractions of protein lysis were extracted. Histone 3 (H3) and tubulin were detected by Western blotting and used as markers to confirm the efficacy of the nuclear fraction extraction. *In vivo* ubiquitination assays were performed as described in *Material and Method* section. All experiments were repeated at least three times with one set of results shown in the figure.

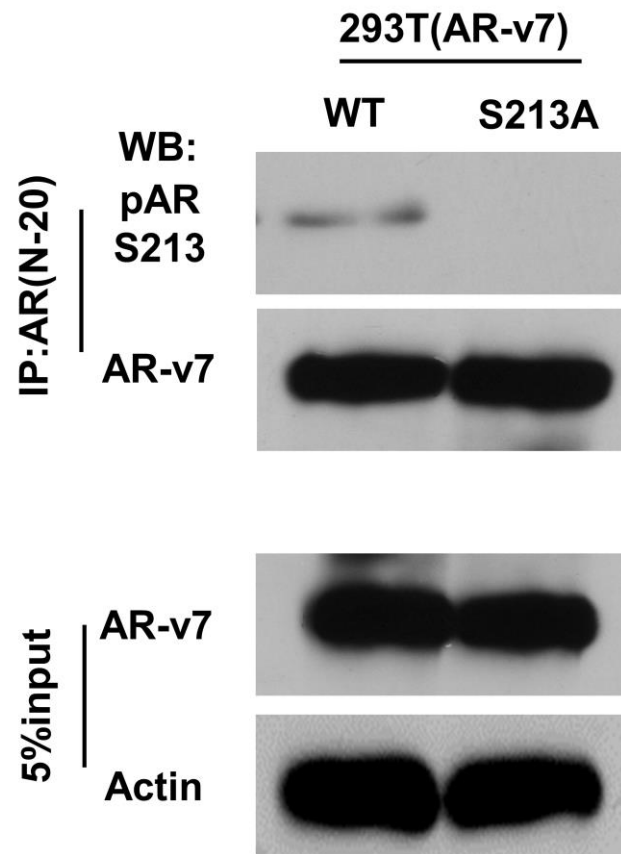

**Figure S7**

293T cells were transfected with wild type or mutant AR-v7 expression vector (S213A) for 24 hours. Protein lysates were and co-immunoprecipitated with AR (N-20) antibody and immunoblotted with phosphor-AR(Ser213) and AR(N-20) antibodies.

## SUPPLEMENTARY MATERIALS

**Table S1 Reagents**

| <b>Name</b>   | <b>Cat No.</b> | <b>Company</b>      |
|---------------|----------------|---------------------|
| Enzalutamide  | HY-70002       | Haoyuan Chemexpress |
| Tautomycetin  | 2305           | Tocris Bioscience   |
| MG132         | 13697          | Cayman Chemical     |
| Epoxomicin    | 10007806       | Cayman Chemical     |
| Cycloheximide | 14126          | CedarlaneLab        |



**Table S2 Real-time qPCR primers**

| <b>Name and location</b> | <b>Sequences</b>             |
|--------------------------|------------------------------|
| AR-FL(Exon 3) F:         | 5'-TCTTGTCGTCTTCGGAAATGT-3'  |
| AR-FL(Exon 4) R:         | 5'-AAGCCTCTCCTTCCTCCTGTA-3'  |
| AR-v7(Exon 3/3b) F:      | 5'-CAGGGATGACTCTGGGAGAA-3'   |
| AR-v7(3' UTR) R:         | 5'-GCCCTCTAGAGCCCTCATTT-3'   |
| 18S rRNA F:              | 5'-TTGACGGAAGGGCACCACCAG-3'  |
| 18S rRNA R:              | 5'-GCACCACCACCCACGGAATCG-3'  |
| PSA F:                   | 5'-AGTGCGAGAAGCATTCCCAAC-3'  |
| PSA R:                   | 5'-CCAGCAAGATCACGCTTTTGTT-3' |
| NKx3.1 F:                | 5'-CCCACACTCAGGTGATCGAG-3'   |
| NKx3.1 R:                | 5'-GAGCTGCTTTCGCTTAGTCTT-3'  |
| AR total(Exon 2) F:      | 5'-GTGGAAGCTGCAAGGTCTTC-3'   |
| AR total(Exon 3) R:      | 5'-GGCGCACAGGTACTTCTGTT-3'   |

**Table S3 siRNAs**

| <b>Name</b>     | <b>Cat No.</b>   | <b>Company</b> |
|-----------------|------------------|----------------|
| siCTL           | sc-37007         | Santa Cruz     |
| siMdm2          | L-003279-00-0005 | Dharmacon      |
| siPP-1 $\alpha$ | sc-36299         | Santa Cruz     |
| siPP-1 $\beta$  | sc-36295         | Santa Cruz     |
| siPP-1 $\gamma$ | sc-36297         | Santa Cruz     |
| siAkt1/2        | sc-43609         | Santa Cruz     |

**Table S4 Antibodies**

| <b>Name</b>   | <b>Description</b> | <b>Cat No.</b> | <b>Company</b>     |
|---------------|--------------------|----------------|--------------------|
| AR            | N-20               | Sc-816         | Santa Cruz         |
| AR-v7         |                    | AG10008        | Precision Antibody |
| pAR           | Ser213             | Sc-135635      | Santa Cruz         |
| Akt           |                    | 9272           | Cell signaling     |
| pAkt          | Ser473             | 9271           | Cell signaling     |
| PP-1 $\alpha$ | C-19               | Sc-6104        | Santa Cruz         |
| PP-1 $\gamma$ | C-19               | Sc-6108        | Santa Cruz         |
| Mdm2          | SMP14              | Sc-965         | Santa Cruz         |
| pMdm2         | Ser166             | Sc-293105      | Santa Cruz         |
| Actin         | Ac-15              | A5441          | Sigma              |
| Flag-tag      | M5                 | F4042          | Sigma              |
| HA-tag        |                    | Sc-7392        | Santa Cruz         |
| Ubiquitin     | P4D1               | 3936           | Cell signaling     |
| Histone H3    |                    | Ab-1791        | Abcam              |
| Tubulin       | TU02               | Sc-8035        | Santa Cruz         |
